# Supplementary material for: Glucosamine-Modified Mesoporous Silica-Coated Magnetic Nanoparticles: A “Raisin-Cake”-like Structure as an Efficient Theranostic Platform for Targeted Methotrexate Delivery
Source: MDPI journal article supplement (doi:10.3390/pharmaceutics15102491), 2023-10-19
Supplement: s1 [file s1]

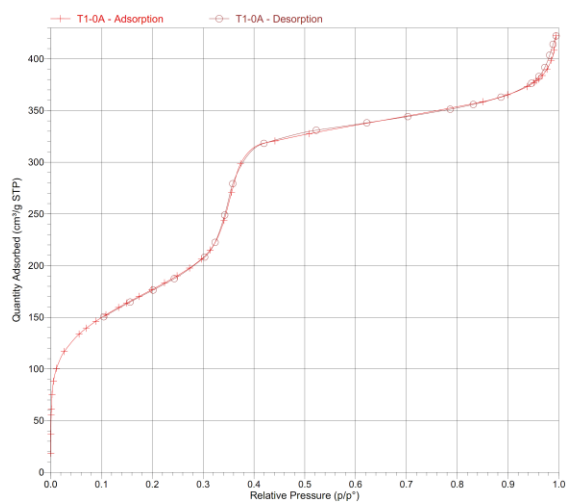

(a)

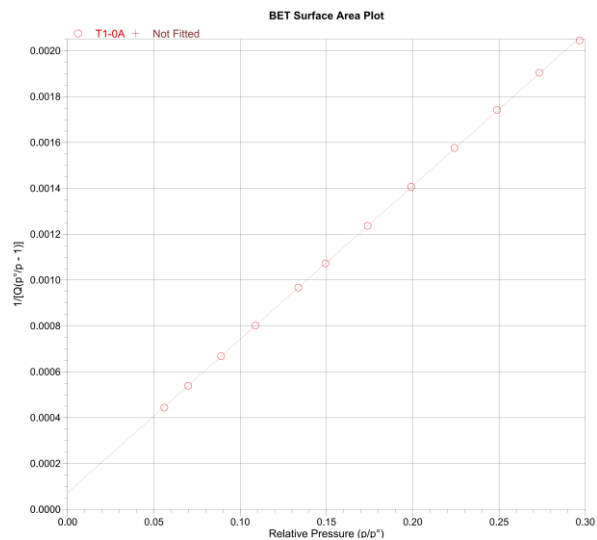

(b)

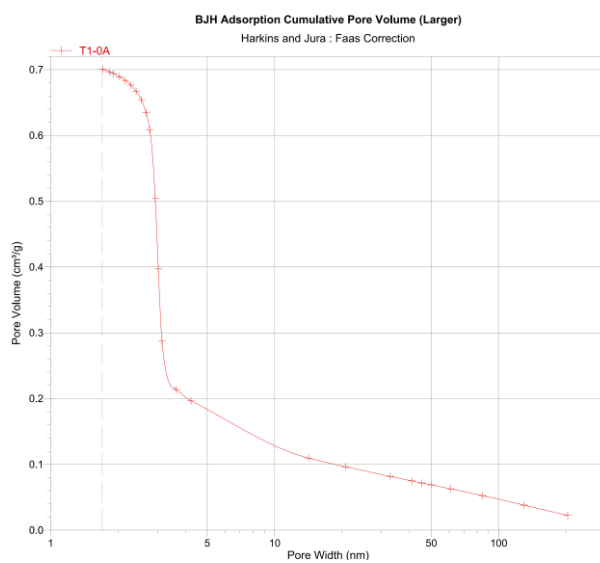

(c)

Figure S1- Porosity characterization of MNP@MSN-Glu, N<sub>2</sub> Adsorption/desorption (a), BET surface area plot (b), BJH adsorption cumulative pore volume (c).

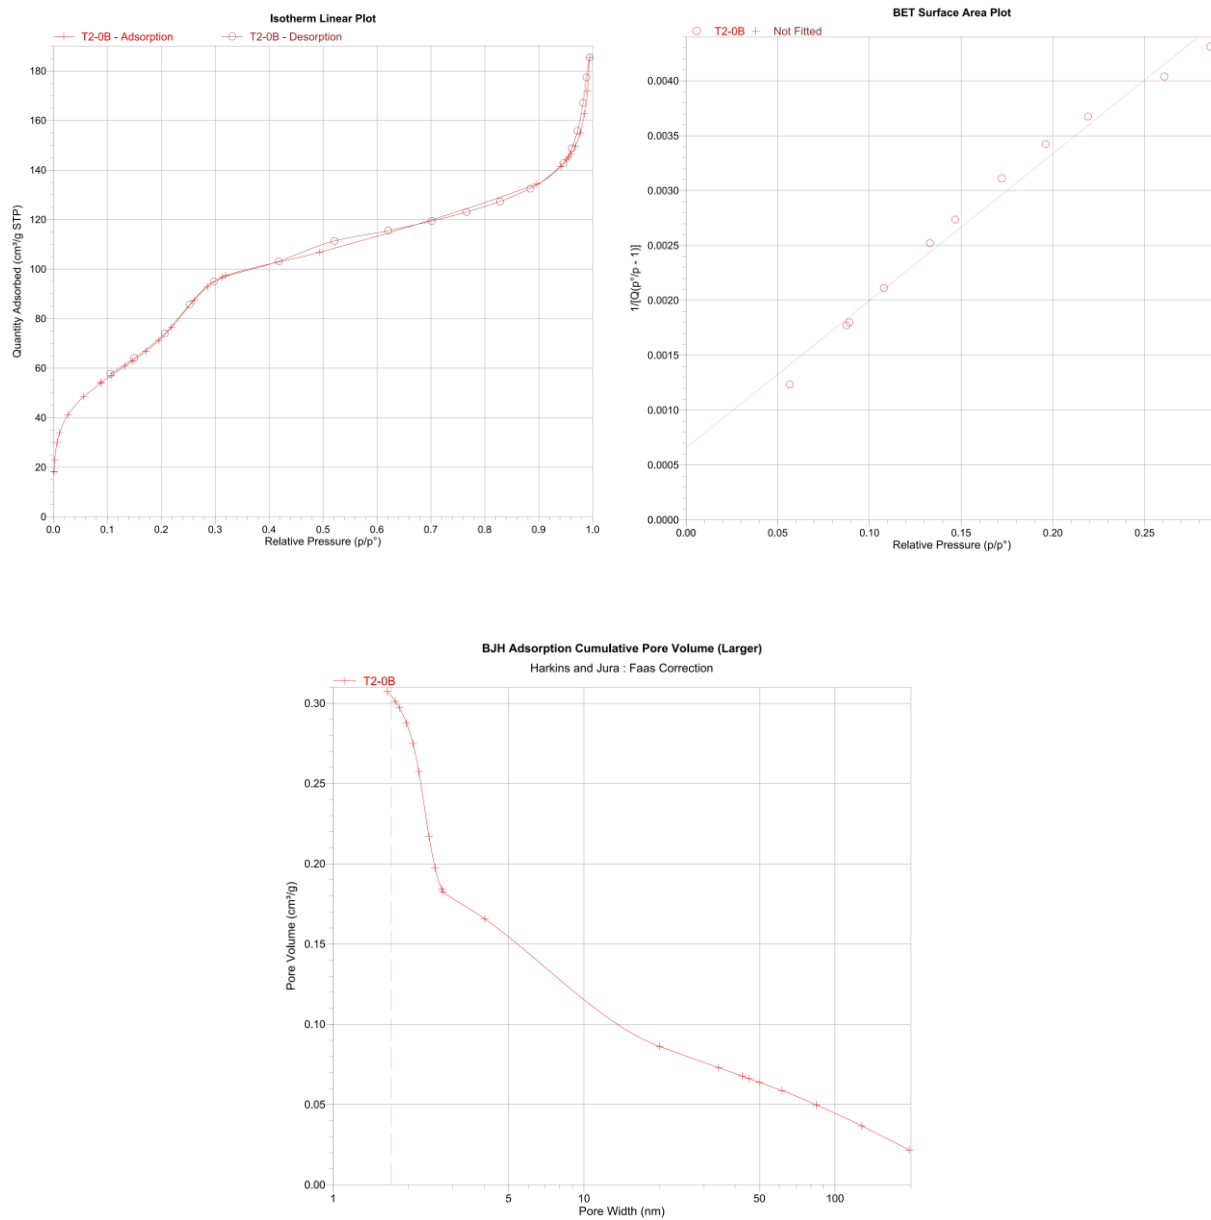

Figure S2- Porosity characterization of MNP@MSN-Glu, N<sub>2</sub> Adsorption/desorption (a), BET surface area plot (b), BJH adsorption cumulative pore volume (c).
